# Supplementary material
Source: PubMed Central journal article supplement (PMC3003340)
Supplement: supp_M110.155408_jbc.M110.155408-1.pdf [file supp_M110.155408_jbc.M110.155408-1.pdf]

## Supplementary Information

### Supplementary Figure Legends

**Supplementary Figure 1** Cadmium sensitivity of the *pcs* and *abc* deletion mutants, expression of ABC transporters during Cd exposure and vacuole staining in wild type and the *abc1-4 hmt1* quintuple mutant. **(A)** Cd sensitivity of the *hmt1*, *pcs* and *abc* deletion mutants, including the *pdr1 bfr1* double mutant. Bfr1 and Pdr1 belong to Cluster I of *S. pombe* ABC transporters (1). **(B)** Vacuolar ABC transporter expression during cadmium exposure. Expression data was plotted using publicly available microarrays (<http://www.bahlerlab.info/cgi-bin/SPGE/geexview>) (2). **(C)** Staining of the vacuolar membrane with FM4-64 to show that vacuole biogenesis and morphology were not affected in the *abc1-4 hmt1* quintuple mutant. Vacuoles were visualized by confocal microscopy after incubation with FM4-64 as described in (1).

**Supplementary Figure 2** Complementation of the *hmt1* mutant by expression of *hmt1*<sup>+</sup>. Cd sensitivity of *hmt1* and *abc2 abc3 hmt1* can be rescued by expression of *hmt1*<sup>+</sup>. The *abc* mutants were transformed with pRep41-Hmt1 using the lithium acetate method and independent transformants were selected on EMMS without Leu. Complemented strains were grown on liquid EMMS without Leu media and 1:10 serial dilutions were spotted on selective plates containing or not cadmium.

**Supplementary Figure 3** Phytochelatin transport mediated by *S. pombe* full-size ABC transporters. Microsomal vesicles obtained from the *hmt1* mutant showed a reduced uptake of <sup>35</sup>S-PC<sub>2</sub> (black columns) and <sup>35</sup>S-PC<sub>2</sub>-Cd (light columns) compared to wild type vesicles. <sup>35</sup>S-PC transport was decreased in the *hmt1* mutant and abolished in the *abc1-4 hmt1* quintuple mutant (data from 3 replicates ± SE). Asterisk denotes a statistically significant difference compared to wild type (P < 0.05).

**Supplementary Figure 4** Abc4 expression in the quintuple *abc1-4 hmt1* quintuple mutant and GS-bimane accumulation in the *hmt1* and *abc2 hmt1* mutants. **(A-B)** Abc4 transports GS-bimane into vacuoles but does not restore Cd tolerance in the *abc1-4 hmt1* mutant. **(A)** Expression of Abc4 in the *abc1-4 hmt1* quintuple mutant restored GS-bimane accumulation in vacuoles. However, **(B)** Abc4 did not rescue the Cd sensitivity of the quintuple *abc1-4 hmt1* mutant. **(C)** GS-bimane accumulation in the *hmt1* single and the *abc2 hmt1* double mutants. The *hmt1* mutant and the double mutant, *abc2 hmt1*, show GS-bimane accumulation in vacuoles suggesting that other ABC transporters (i.e. Abc4) have overlapping functions and are able to sequester GS-conjugates into vacuoles.

**Supplementary Figure 5** Phytochelatin content in *S. pombe abc* mutants and identification of phytochelatin in *S. pombe* high-molecular-weight complexes (HMWCs). **(A)** Phytochelatin in cell extracts from the different *abc* mutants were quantified by HPLC. The *abc1-4 hmt1* quintuple mutant showed a strong decrease in phytochelatin levels. Expression of either Hmt1 or Abc2 in the quintuple *abc1-4 hmt1* mutant restored the phytochelatin content in cell extracts (n = 3 experiments, ± SD). \* denotes a statistically significant difference compared to wild type (P < 0.05). \*\* denotes a statistically significant difference compared to *abc1-4 hmt1* (P < 0.05). **(B)** Phytochelatin in high molecular fractions of *S. pombe* cell extracts. Soluble cell extracts from yeast exposed to Cd were loaded onto a Superdex 75 10/300 GL column equilibrated with 20 mM Tris pH 7.7. Fractions (2 ml) were collected, concentrated using 3 kDa cut-off centrifugal

devices. Thiols were labeled, separated and detected by fluorescence HPLC coupled to mass spectrometry as previously described (3).

**Supplementary Figure 6** Phylogenetic tree of the 11 *S. pombe* ABC transporters and the *Arabidopsis* MRP/ABCC subfamily. The tree was constructed using the standard parameters suggested in *phylogeny.fr* (4). Amino acid sequences were obtained from TAIR (The Arabidopsis Information Resource, <http://www.arabidopsis.org/>) and the *Schizosaccharomyces pombe* database (<http://genedb.org/genedb/pombe/>).

**Supplementary Table 1** *Schizosaccharomyces pombe* strains used in this study.

| Strain                          | Genotype                                                                                  | Source     |
|---------------------------------|-------------------------------------------------------------------------------------------|------------|
| <i>Wild type</i>                | h- ura4-D18 leu1-32                                                                       |            |
| <i>pcs</i>                      | h- ura4-D18 leu1-32 pcs::kanMX4                                                           | This study |
| <i>hmt1</i>                     | h- ura4-D18 leu1-32 hmt1::natMX6                                                          | This study |
| <i>pcs hmt1</i>                 | h- ura4-D18 leu1-32 hmt1::natMX6 pcs::kanMX4                                              | This study |
| <i>abc2</i>                     | h- ura4-D18 leu1-32 ade6 abc2::kanMX4                                                     | This study |
| <i>abc2 hmt1</i>                | h- ura4-D18 leu1-32 ade6 abc2::kanMX4 hmt1::natMX6                                        | This study |
| <i>abc3 hmt1</i>                | h- ura4-D18 leu1-32 ade6 abc3::kanMX4 hmt1::natMX6                                        | This study |
| <i>abc4 hmt1</i>                | h- ura4-D18 leu1-32 abc4::kanMX4 hmt1::natMX6                                             | This study |
| <i>abc2 abc3 hmt1</i>           | h- ura4-D18 leu1-32 ade6 abc2::kanMX4 abc3::kanMX4 hmt1::natMX6                           | This study |
| <i>abc2 abc4 hmt1</i>           | h- ura4-D18 leu1-32 abc2::kanMX4 abc4::kanMX4 hmt1::natMX6                                | This study |
| <i>abc1 abc2 abc3 abc4</i>      | h- ura4-C190T leu1-32 ade7::ura4 abc1::ura4 abc2::ura4 abc3::ura4 abc4::ura4              | (1)        |
| <i>abc1 abc2 abc3 abc4 hmt1</i> | h- ura4-C190T leu1-32 ade7::ura4 abc1::ura4 abc2::ura4 abc3::ura4 abc4::ura4 hmt1::natMX6 | This study |

**Author Contributions.** DGMC and JIS designed the experiments in discussions with PR and OKV. DGMC cloned *abc2*<sup>+</sup>, *hmt1*<sup>+</sup> and performed the experiments in Figs. 1-2, 3A and B, 4A-F, 5 and Supp. Figs 1,2,4, 5B. TOJ performed experiments in Fig. 3A-C. GZA contributed to *Abc4* experiments. ZZ and OKV isolated *S. pombe* vacuoles and performed the experiments in Fig. 3F and Supp. Fig. 5A. ZZ, VIK and OKV performed the experiments in Fig. 4G and H. OL and MRR generated the *S. pombe* deletion strains. WYS and EM generated the *S. cerevisiae* Sm14 and Sm15 strains and performed experiments in Supp. Fig. 3. DGMC and JIS wrote the paper.

## References

1. Iwaki, T., Giga-Hama, Y., and Takegawa, K. (2006) *Microbiology* **152**, 2309-2321
2. Chen, D., Toone, W. M., Mata, J., Lyne, R., Burns, G., Kivinen, K., Brazma, A., Jones, N., and Bahler, J. (2003) *Mol. Biol. Cell.* **14**, 214-229
3. Mendoza-Cozatl, D. G., Butko, E., Springer, F., Torpey, J. W., Komives, E. A., Kehr, J., and Schroeder, J. I. (2008) *Plant J.* **54**, 249-259
4. Dereeper, A., Guignon, V., Blanc, G., Audic, S., Buffet, S., Chevenet, F., Dufayard, J. F., Guindon, S., Lefort, V., Lescot, M., Claverie, J. M., and Gascuel, O. (2008) *Nucleic Acids Res.* **36**, W465-469.

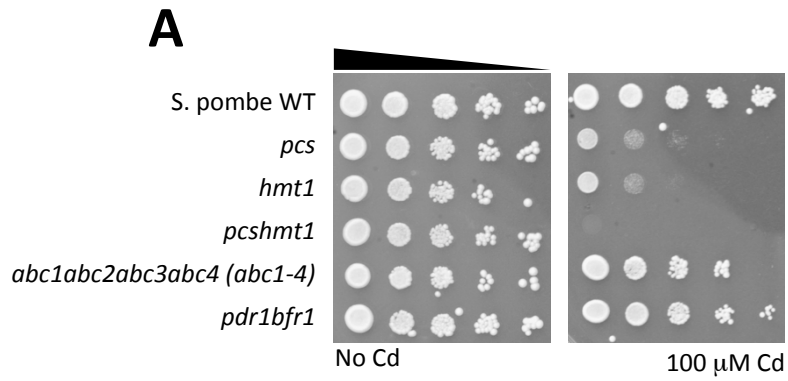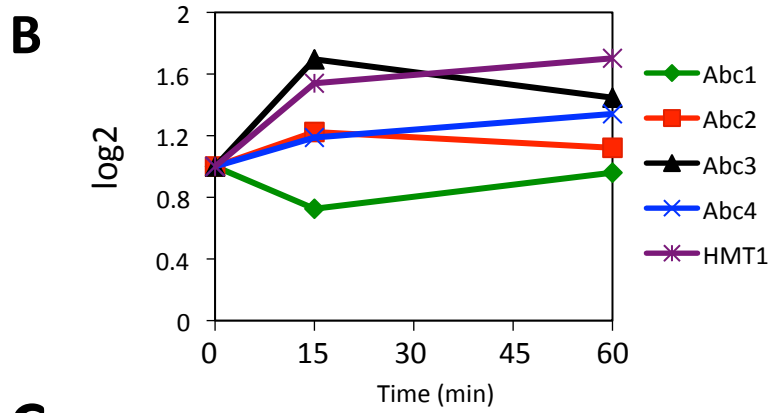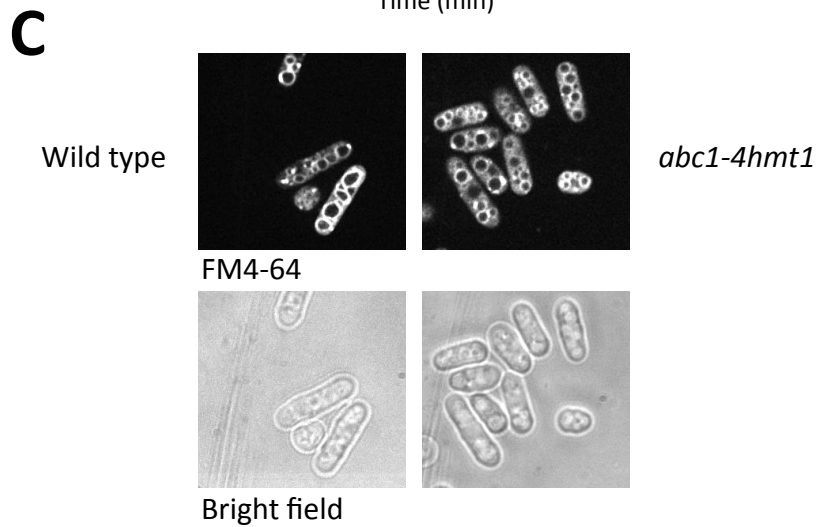

**Supp Fig 1**

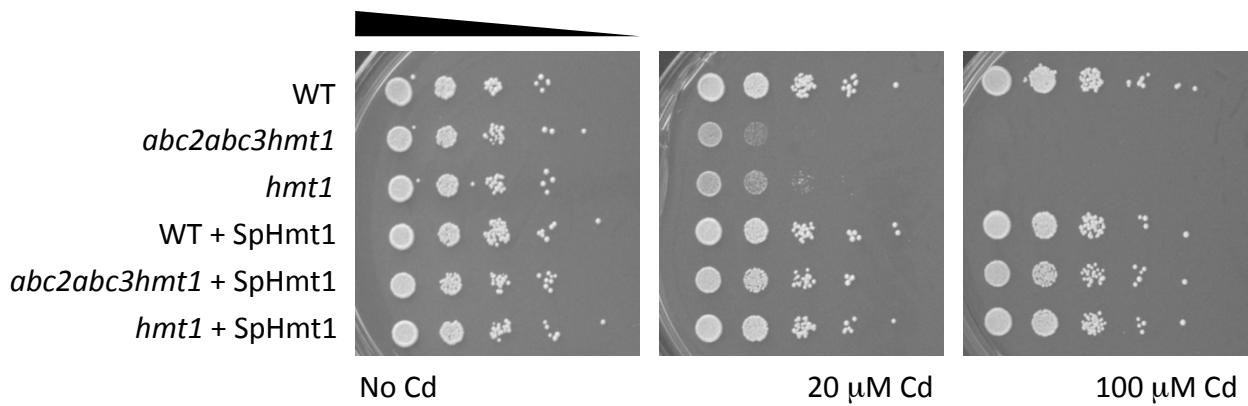

**Supp Fig 2**

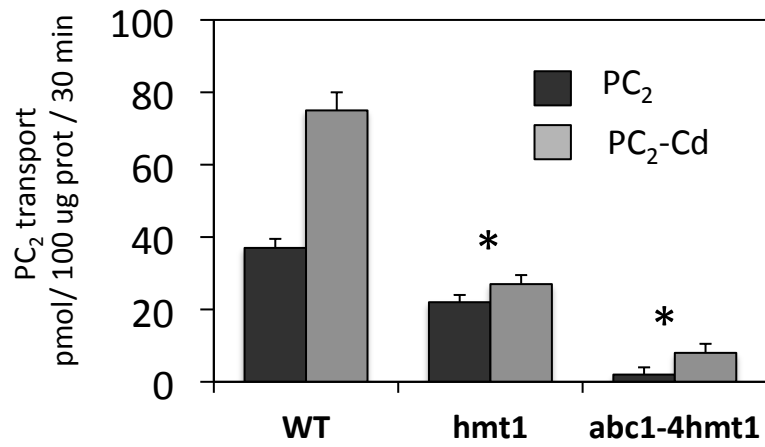

### Supp Fig 3

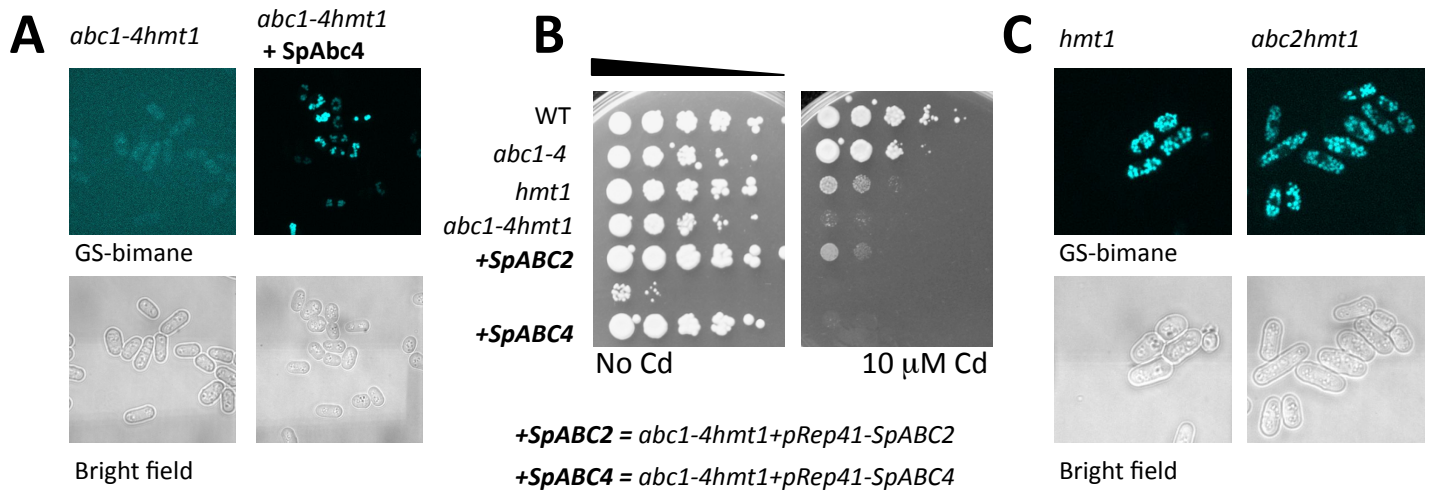

### Supp Fig 4

**A**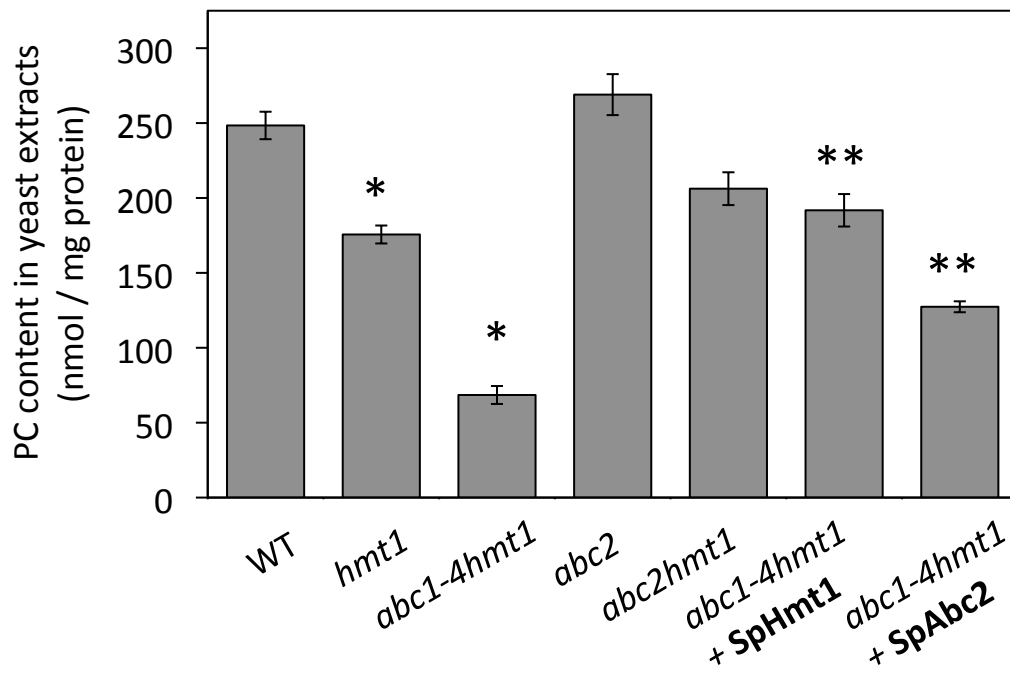**B**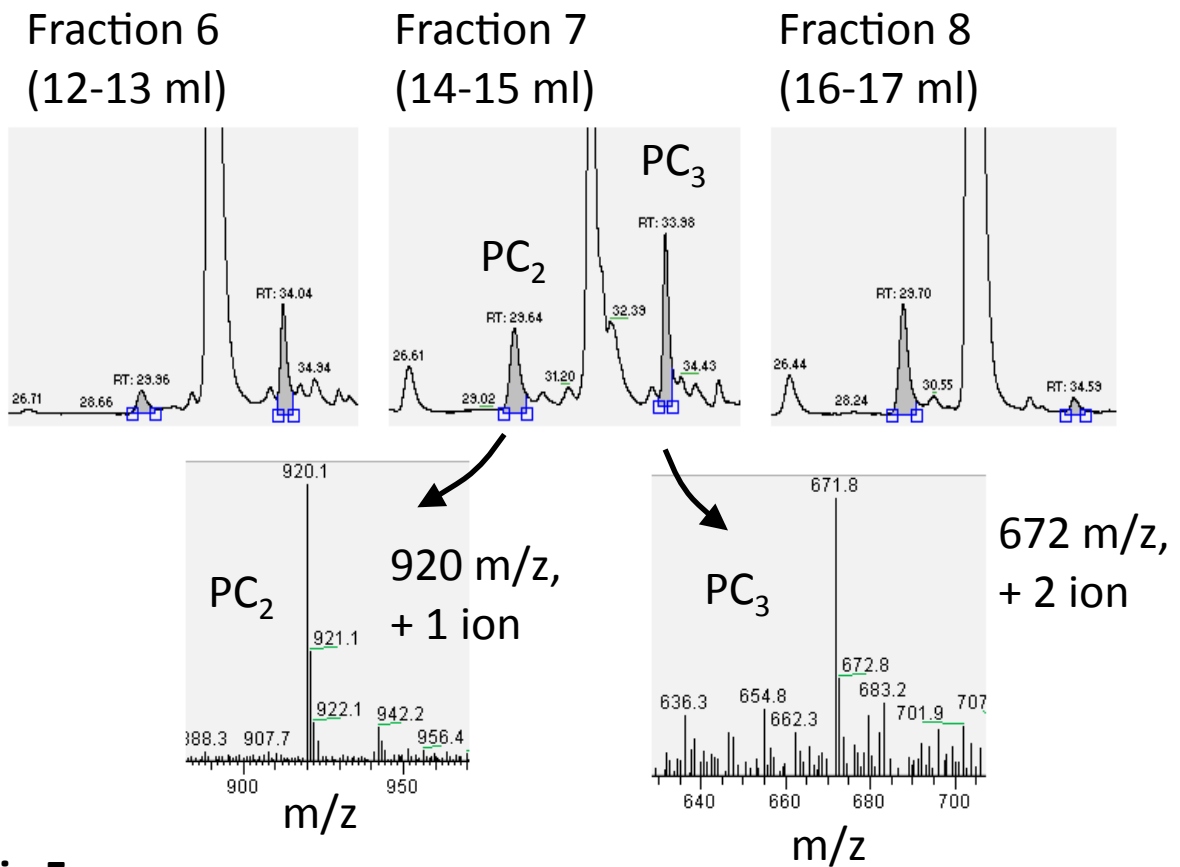

Supp Fig 5

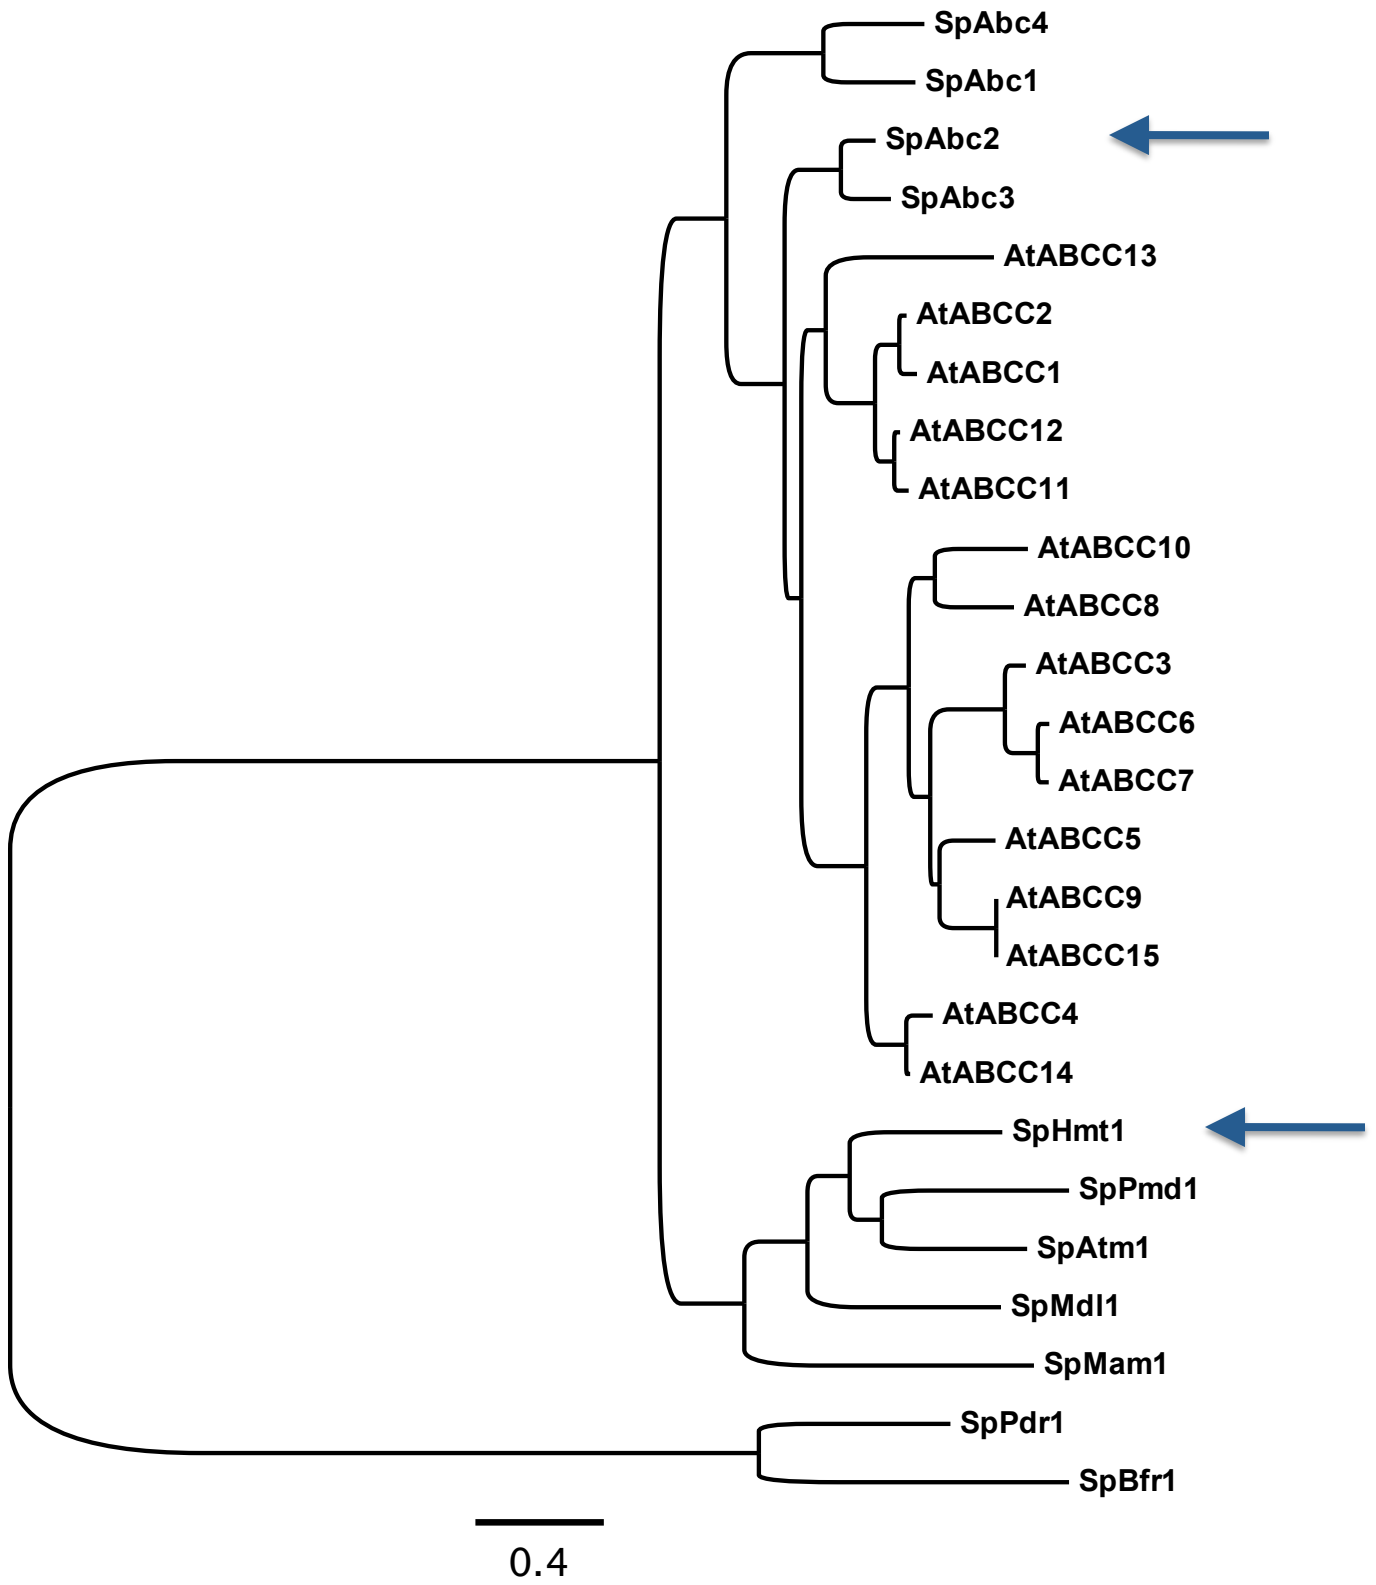

Supp Fig 6
